# Supplementary material for: Histological and Transcriptomic Analysis of Adult Japanese Medaka Sampled Onboard the International Space Station
Source: PLoS One. 2015 Oct 1;10(10):e0138799. doi: 10.1371/journal.pone.0138799 (PMC4591011; doi:10.1371/journal.pone.0138799)
Supplement: S12 Table — (XLSX) [file pone.0138799.s016.xlsx]

## Sheet: Sheet1
Genes down regulated in SFs (testis)
Gene Symbol	Description	Ensembl GeneID	RPKM (GCs)	RPKM (SFs)	SR (testis)
ZNF414	Uncharacterized protein [Source:UniProtKB/TrEMBL;Acc:H2L3A7]	ENSORLG00000000180	46.72	22.19	-1.07413
ZAR1	Uncharacterized protein [Source:UniProtKB/TrEMBL;Acc:H2L3I5]	ENSORLG00000000251	5.46	1.37	-1.99473
RAB27B (2 of 2)	RAB27B, member RAS oncogene family [Source:HGNC Symbol;Acc:9767]	ENSORLG00000000417	19.32	9.02	-1.0989
OLA.8	uncharacterized protein LOC100049343 precursor [Source:RefSeq peptide;Acc:NP_001098227]	ENSORLG00000000419	22.6	4.21	-2.42443
	Uncharacterized protein [Source:UniProtKB/TrEMBL;Acc:H2L447]	ENSORLG00000000429	6.45	1.06	-2.60523
	Uncharacterized protein [Source:UniProtKB/TrEMBL;Acc:H2L4D6]	ENSORLG00000000512	10.53	4.9	-1.10365
S100A12	Uncharacterized protein [Source:UniProtKB/TrEMBL;Acc:H2L4G9]	ENSORLG00000000536	15.97	2.6	-2.61878
	Uncharacterized protein [Source:UniProtKB/TrEMBL;Acc:H2L4P5]	ENSORLG00000000602	3.22	1.37	-1.23288
OLA.9846	Uncharacterized protein [Source:UniProtKB/TrEMBL;Acc:H2L4W9]	ENSORLG00000000667	37.29	6.51	-2.51806
	Uncharacterized protein [Source:UniProtKB/TrEMBL;Acc:H2L4X2]	ENSORLG00000000673	11.34	4.13	-1.45721
ECH1	Uncharacterized protein [Source:UniProtKB/TrEMBL;Acc:H2L4Y0]	ENSORLG00000000679	18.54	9.25	-1.00312
	Uncharacterized protein [Source:UniProtKB/TrEMBL;Acc:H2L526]	ENSORLG00000000717	29.71	9.88	-1.58837
	Uncharacterized protein [Source:UniProtKB/TrEMBL;Acc:H2L573]	ENSORLG00000000766	6.11	1.86	-1.71587
PDCD2L	Uncharacterized protein [Source:UniProtKB/TrEMBL;Acc:H2L5D4]	ENSORLG00000000817	6.29	2.76	-1.18839
		ENSORLG00000001172	2.55	1.22	-1.06362
TRMT12	Uncharacterized protein [Source:UniProtKB/TrEMBL;Acc:H2L6W7]	ENSORLG00000001280	34.59	12.39	-1.48118
OLA.26842	Uncharacterized protein [Source:UniProtKB/TrEMBL;Acc:H2L759]	ENSORLG00000001350	9.9	1.37	-2.85325
IQCB1	Uncharacterized protein [Source:UniProtKB/TrEMBL;Acc:H2L7I8]	ENSORLG00000001455	25.88	11.11	-1.21998
	Uncharacterized protein [Source:UniProtKB/TrEMBL;Acc:H2L8L4]	ENSORLG00000001757	25.03	10.57	-1.24368
COX4I2	Uncharacterized protein [Source:UniProtKB/TrEMBL;Acc:H2L8S5]	ENSORLG00000001813	15.23	6.45	-1.23954
	Uncharacterized protein [Source:UniProtKB/TrEMBL;Acc:H2L9P5]	ENSORLG00000002075	4.45	1.36	-1.7102
	Uncharacterized protein [Source:UniProtKB/TrEMBL;Acc:H2L9R5]	ENSORLG00000002097	98.33	33.99	-1.53252
SLC43A3 (2 of 2)	solute carrier family 43, member 3 [Source:HGNC Symbol;Acc:17466]	ENSORLG00000002116	6.2	2.17	-1.51457
EXOSC7	Uncharacterized protein [Source:UniProtKB/TrEMBL;Acc:H2LA89]	ENSORLG00000002251	61.32	27.17	-1.17434
	Uncharacterized protein [Source:UniProtKB/TrEMBL;Acc:H2LAS7]	ENSORLG00000002406	20.72	3.46	-2.58218
PELI1 (1 of 2)	pellino E3 ubiquitin protein ligase 1 [Source:HGNC Symbol;Acc:8827]	ENSORLG00000002477	111.27	53.71	-1.0508
	Uncharacterized protein [Source:UniProtKB/TrEMBL;Acc:H2LBD8]	ENSORLG00000002577	3.24	1.57	-1.04523
	Uncharacterized protein [Source:UniProtKB/TrEMBL;Acc:H2LBE0]	ENSORLG00000002579	29.44	12.92	-1.18817
KRT222	Uncharacterized protein [Source:UniProtKB/TrEMBL;Acc:H2LBH0]	ENSORLG00000002603	8.36	4.14	-1.01387
CCR7	Uncharacterized protein [Source:UniProtKB/TrEMBL;Acc:H2LBI9]	ENSORLG00000002623	19.14	4.31	-2.15083
SAT1	Uncharacterized protein [Source:UniProtKB/TrEMBL;Acc:H2LBP3]	ENSORLG00000002664	144.29	70.63	-1.03062
OLA.10286	Uncharacterized protein [Source:UniProtKB/TrEMBL;Acc:H2LBS0]	ENSORLG00000002687	16.47	5.49	-1.58496
H1FOO	Uncharacterized protein [Source:UniProtKB/TrEMBL;Acc:H2LBS8]	ENSORLG00000002694	9.48	2.55	-1.89439
TRAPPC1	Uncharacterized protein [Source:UniProtKB/TrEMBL;Acc:H2LBU5]	ENSORLG00000002706	93.19	41.33	-1.17299
PSMB6	Proteasome subunit beta type [Source:UniProtKB/TrEMBL;Acc:H2LC09]	ENSORLG00000002755	62.68	28.82	-1.12093
	Uncharacterized protein [Source:UniProtKB/TrEMBL;Acc:H2LC18]	ENSORLG00000002762	29.14	8.62	-1.75724
	Uncharacterized protein [Source:UniProtKB/TrEMBL;Acc:H2LC94]	ENSORLG00000002829	3.21	1.36	-1.23897
	Uncharacterized protein [Source:UniProtKB/TrEMBL;Acc:H2LCR2]	ENSORLG00000002963	34.45	16.36	-1.07433
	Uncharacterized protein [Source:UniProtKB/TrEMBL;Acc:H2LCT8]	ENSORLG00000002988	20.58	4.01	-2.35957
	Uncharacterized protein [Source:UniProtKB/TrEMBL;Acc:H2LD06]	ENSORLG00000003046	61.71	28.9	-1.09443
APOLD1 (3 of 4)	apolipoprotein L domain containing 1 [Source:HGNC Symbol;Acc:25268]	ENSORLG00000003100	15.04	6.75	-1.15585
OLA.13460	Uncharacterized protein [Source:UniProtKB/TrEMBL;Acc:H2LD67]	ENSORLG00000003105	37.41	5.27	-2.82755
RWDD2B	Uncharacterized protein [Source:UniProtKB/TrEMBL;Acc:H2LDT1]	ENSORLG00000003293	4.48	1.45	-1.62745
CHCHD8	Uncharacterized protein [Source:UniProtKB/TrEMBL;Acc:H2LE46]	ENSORLG00000003391	67.81	28.54	-1.24851
RDH1	Uncharacterized protein [Source:UniProtKB/TrEMBL;Acc:H2LEH4]	ENSORLG00000003489	26.99	10.74	-1.32943
	Uncharacterized protein [Source:UniProtKB/TrEMBL;Acc:H2LF25]	ENSORLG00000003656	12.49	5.42	-1.20441
OLA.26125	Uncharacterized protein [Source:UniProtKB/TrEMBL;Acc:H2LF60]	ENSORLG00000003684	13.42	2.25	-2.57639
OLA.6855	Uncharacterized protein [Source:UniProtKB/TrEMBL;Acc:H2LF72]	ENSORLG00000003694	24.26	10.6	-1.19452
	Uncharacterized protein [Source:UniProtKB/TrEMBL;Acc:H2LFZ2]	ENSORLG00000003910	8.35	2.32	-1.84765
		ENSORLG00000004036	3.88	1.92	-1.01495
CPO	Uncharacterized protein [Source:UniProtKB/TrEMBL;Acc:H2LGM5]	ENSORLG00000004091	5.52	1.66	-1.73349
NUDT15	Uncharacterized protein [Source:UniProtKB/TrEMBL;Acc:H2LGM9]	ENSORLG00000004095	6.85	2.13	-1.68525
KAT7 (2 of 2)	K(lysine) acetyltransferase 7 [Source:HGNC Symbol;Acc:17016]	ENSORLG00000004096	74.76	36.91	-1.01825
	Uncharacterized protein [Source:UniProtKB/TrEMBL;Acc:H2LGN3]	ENSORLG00000004099	9.36	3.34	-1.48666
	Uncharacterized protein [Source:UniProtKB/TrEMBL;Acc:H2LGN9]	ENSORLG00000004103	4.69	2.17	-1.11189
OLA.10133	Uncharacterized protein [Source:UniProtKB/TrEMBL;Acc:H2LGX8]	ENSORLG00000004178	7.18	2.26	-1.66766
B9D2	Uncharacterized protein [Source:UniProtKB/TrEMBL;Acc:H2LJ33]	ENSORLG00000004781	86.65	36.43	-1.25007
ZFAT	Uncharacterized protein [Source:UniProtKB/TrEMBL;Acc:H2LJ60]	ENSORLG00000004805	23.33	11.44	-1.0281
TESPA1	Uncharacterized protein [Source:UniProtKB/TrEMBL;Acc:H2LKK2]	ENSORLG00000005202	11.16	4.52	-1.30394
RPS28	Uncharacterized protein [Source:UniProtKB/TrEMBL;Acc:H2LKS2]	ENSORLG00000005256	65.89	28.98	-1.185
CCK (2 of 2)	cholecystokinin [Source:HGNC Symbol;Acc:1569]	ENSORLG00000005594	40.34	18.22	-1.14669
OLA.5739	Fructose-bisphosphate aldolase [Source:UniProtKB/TrEMBL;Acc:H2LPL6]	ENSORLG00000006367	11.2	4.82	-1.21639
VKORC1	Uncharacterized protein [Source:UniProtKB/TrEMBL;Acc:H2LQ92]	ENSORLG00000006556	7.39	3.05	-1.27677
OLA.8941	Uncharacterized protein [Source:UniProtKB/TrEMBL;Acc:H2LQE5]	ENSORLG00000006602	7.6	3.44	-1.14359
PTGDS (1 of 2)	prostaglandin D2 synthase 21kDa (brain) [Source:HGNC Symbol;Acc:9592]	ENSORLG00000006624	4.84	1.13	-2.09868
RHBDD3 (1 of 2)	rhomboid domain containing 3 [Source:HGNC Symbol;Acc:1308]	ENSORLG00000006722	55.27	23.49	-1.23445
GPD1 (2 of 2)	glycerol-3-phosphate dehydrogenase 1 (soluble) [Source:HGNC Symbol;Acc:4455]	ENSORLG00000006847	2.07	1.03	-1.00699
LMO1	Uncharacterized protein [Source:UniProtKB/TrEMBL;Acc:H2LRB7]	ENSORLG00000006857	4.24	1.4	-1.59864
NAV1 (1 of 2)	neuron navigator 1 [Source:HGNC Symbol;Acc:15989]	ENSORLG00000007109	4.03	1.2	-1.74775
COQ4	Uncharacterized protein [Source:UniProtKB/TrEMBL;Acc:H2LSD5]	ENSORLG00000007173	9.23	4.61	-1.00156
FAM132B	Uncharacterized protein [Source:UniProtKB/TrEMBL;Acc:H2LSF6]	ENSORLG00000007187	5.48	2.23	-1.29713
	Uncharacterized protein [Source:UniProtKB/TrEMBL;Acc:H2LSR3]	ENSORLG00000007280	25.59	11.39	-1.16781
NDUFS5	Uncharacterized protein [Source:UniProtKB/TrEMBL;Acc:H2LSZ1]	ENSORLG00000007344	88.01	39.59	-1.15253
LAYN (2 of 2)	layilin [Source:HGNC Symbol;Acc:29471]	ENSORLG00000007476	10.14	3.07	-1.72375
NRGN	Uncharacterized protein [Source:UniProtKB/TrEMBL;Acc:H2LTM9]	ENSORLG00000007535	16.2	6.33	-1.35572
OLA.27797	Elongation factor 1-alpha [Source:UniProtKB/TrEMBL;Acc:H2LTT6]	ENSORLG00000007585	14.39	6.64	-1.11581
ANXA2 (1 of 2)	annexin A2 [Source:HGNC Symbol;Acc:537]	ENSORLG00000007609	4.06	1.21	-1.74647
CEP72	Uncharacterized protein [Source:UniProtKB/TrEMBL;Acc:H2LVN7]	ENSORLG00000008103	11.19	4.89	-1.1943
OLA.17881	Uncharacterized protein [Source:UniProtKB/TrEMBL;Acc:H2LWA3]	ENSORLG00000008282	6.09	2.67	-1.1896
IFT20	Uncharacterized protein [Source:UniProtKB/TrEMBL;Acc:H2LWU8]	ENSORLG00000008436	163.8	76.61	-1.09633
SLC25A21	Uncharacterized protein [Source:UniProtKB/TrEMBL;Acc:H2LXE0]	ENSORLG00000008606	9.46	4.33	-1.12747
GNG13 (2 of 2)	guanine nucleotide binding protein (G protein), gamma 13 [Source:HGNC Symbol;Acc:14131]	ENSORLG00000008747	15.96	7.54	-1.08182
PRHOXNB	Uncharacterized protein [Source:UniProtKB/TrEMBL;Acc:H2LXZ1]	ENSORLG00000008761	22.14	7.26	-1.60861
	Uncharacterized protein [Source:UniProtKB/TrEMBL;Acc:H2LY72]	ENSORLG00000008834	14.48	1.82	-2.99205
OLA.10370	Uncharacterized protein [Source:UniProtKB/TrEMBL;Acc:H2LY85]	ENSORLG00000008845	31.36	4.25	-2.88339
GNG2	Guanine nucleotide-binding protein subunit gamma [Source:UniProtKB/TrEMBL;Acc:H2LYA5]	ENSORLG00000008863	3.68	1.69	-1.12268
	Uncharacterized protein [Source:UniProtKB/TrEMBL;Acc:H2LYH7]	ENSORLG00000008923	2.79	1.15	-1.27863
ABHD12B (1 of 2)	abhydrolase domain containing 12B [Source:HGNC Symbol;Acc:19837]	ENSORLG00000008963	5.53	1.72	-1.68487
	Uncharacterized protein [Source:UniProtKB/TrEMBL;Acc:H2LZ13]	ENSORLG00000009079	58.74	24.98	-1.23357
CDKL1	Uncharacterized protein [Source:UniProtKB/TrEMBL;Acc:H2LZ34]	ENSORLG00000009092	24.21	8.24	-1.55489
OLA.9844	Uncharacterized protein [Source:UniProtKB/TrEMBL;Acc:H2LZ50]	ENSORLG00000009106	3.85	1.19	-1.6939
OLA.5553	Uncharacterized protein [Source:UniProtKB/TrEMBL;Acc:H2LZF9]	ENSORLG00000009193	8.65	2.49	-1.79655
DNTTIP1	Uncharacterized protein [Source:UniProtKB/TrEMBL;Acc:H2LZS1]	ENSORLG00000009282	37.12	15.02	-1.30531
OLA.7012	Uncharacterized protein [Source:UniProtKB/TrEMBL;Acc:H2LZY4]	ENSORLG00000009336	4.34	1.65	-1.39523
RBM17	Uncharacterized protein [Source:UniProtKB/TrEMBL;Acc:H2M027]	ENSORLG00000009371	43.16	20.74	-1.05728
	Uncharacterized protein [Source:UniProtKB/TrEMBL;Acc:H2M0C7]	ENSORLG00000009457	8.11	3.37	-1.26695
C1ORF216	Uncharacterized protein [Source:UniProtKB/TrEMBL;Acc:H2M1F5]	ENSORLG00000009755	3.4	1.43	-1.24952
	Uncharacterized protein [Source:UniProtKB/TrEMBL;Acc:H2M1S9]	ENSORLG00000009853	11.35	3.2	-1.82655
OLA.19	ZPC domain containing protein 3 precursor [Source:RefSeq peptide;Acc:NP_001098219]	ENSORLG00000009867	6.09	1.18	-2.36766
TMEM107	Uncharacterized protein [Source:UniProtKB/TrEMBL;Acc:H2M1X0]	ENSORLG00000009892	10.71	5.06	-1.08175
S100G	S100 calcium binding protein G [Source:HGNC Symbol;Acc:1436]	ENSORLG00000009914	15.35	5.73	-1.42163
GBGT1	Uncharacterized protein [Source:UniProtKB/TrEMBL;Acc:H2M2R9]	ENSORLG00000010140	3.16	1.27	-1.3151
	Uncharacterized protein [Source:UniProtKB/TrEMBL;Acc:H2M3M2]	ENSORLG00000010399	3.52	1.19	-1.56461
ANXA3	Annexin [Source:UniProtKB/TrEMBL;Acc:H2M3T8]	ENSORLG00000010454	13.84	6.68	-1.05092
C6ORF136	Uncharacterized protein [Source:UniProtKB/TrEMBL;Acc:H2M3Y7]	ENSORLG00000010492	65.63	30.44	-1.10839
	Uncharacterized protein [Source:UniProtKB/TrEMBL;Acc:H2M434]	ENSORLG00000010526	188.81	73.97	-1.35192
OLA.15992	Uncharacterized protein [Source:UniProtKB/TrEMBL;Acc:H2M559]	ENSORLG00000010830	136.01	65.89	-1.04558
RGS16 (1 of 2)	regulator of G-protein signaling 16 [Source:HGNC Symbol;Acc:9997]	ENSORLG00000010887	4.14	1.85	-1.16211
KCNK2 (2 of 2)	potassium channel, subfamily K, member 2 [Source:HGNC Symbol;Acc:6277]	ENSORLG00000011020	6.28	2.97	-1.0803
SYTL1	Uncharacterized protein [Source:UniProtKB/TrEMBL;Acc:H2M5V0]	ENSORLG00000011030	6.31	3.05	-1.04883
IER2 (1 of 2)	immediate early response 2 [Source:HGNC Symbol;Acc:28871]	ENSORLG00000011036	15.54	6.3	-1.30256
CXCR4 (2 of 2)	chemokine (C-X-C motif) receptor 4 [Source:HGNC Symbol;Acc:2561]	ENSORLG00000011337	3.9	1.6	-1.2854
B4GALT7	Uncharacterized protein [Source:UniProtKB/TrEMBL;Acc:H2M7N7]	ENSORLG00000011570	25.02	10.6	-1.23902
	Uncharacterized protein [Source:UniProtKB/TrEMBL;Acc:H2M7T6]	ENSORLG00000011605	31.74	14.13	-1.16754
KNG1	Uncharacterized protein [Source:UniProtKB/TrEMBL;Acc:H2M802]	ENSORLG00000011656	3.94	1.22	-1.69131
TAF6L	Uncharacterized protein [Source:UniProtKB/TrEMBL;Acc:H2M8I9]	ENSORLG00000011816	38.02	18.09	-1.07157
RNASEH2B	Uncharacterized protein [Source:UniProtKB/TrEMBL;Acc:H2M8M5]	ENSORLG00000011850	13.17	6.11	-1.10801
C19ORF53	Uncharacterized protein [Source:UniProtKB/TrEMBL;Acc:H2M8T9]	ENSORLG00000011899	6.09	2.32	-1.39232
GAPDH	Uncharacterized protein [Source:UniProtKB/TrEMBL;Acc:H2M9V7]	ENSORLG00000012224	25.02	11.09	-1.17382
OLA.27082	ZPC domain containing protein 1 [Source:RefSeq peptide;Acc:NP_001098218]	ENSORLG00000012249	11.08	4.37	-1.34225
OLA.20	Uncharacterized protein [Source:UniProtKB/TrEMBL;Acc:H2MA08]	ENSORLG00000012273	4.45	1.27	-1.80898
DEPDC7 (2 of 2)	DEP domain containing 7 [Source:HGNC Symbol;Acc:29899]	ENSORLG00000012357	3.62	1.6	-1.17792
OLA.5226	ZPA domain containing protein precursor [Source:RefSeq peptide;Acc:NP_001098216]	ENSORLG00000012471	21.5	8.34	-1.36622
GGCT	Uncharacterized protein [Source:UniProtKB/TrEMBL;Acc:H2MAU6]	ENSORLG00000012505	14.21	6.23	-1.1896
OLA.9666	Uncharacterized protein [Source:UniProtKB/TrEMBL;Acc:H2MAX3]	ENSORLG00000012527	11	1.73	-2.66866
KRT23 (7 of 7)	keratin 23 (histone deacetylase inducible) [Source:HGNC Symbol;Acc:6438]	ENSORLG00000012618	13.53	2.84	-2.2522
	Uncharacterized protein [Source:UniProtKB/TrEMBL;Acc:H2MB87]	ENSORLG00000012625	20.19	2.86	-2.81955
HPCAL1	Uncharacterized protein [Source:UniProtKB/TrEMBL;Acc:H2MBE7]	ENSORLG00000012666	6.48	2.83	-1.19519
OLA.27167	Uncharacterized protein [Source:UniProtKB/TrEMBL;Acc:H2MBF5]	ENSORLG00000012675	5.76	2.72	-1.08246
MRPL2	Uncharacterized protein [Source:UniProtKB/TrEMBL;Acc:H2MC57]	ENSORLG00000012882	84.45	42.04	-1.00633
TUBB (2 of 2)	tubulin, beta class I [Source:HGNC Symbol;Acc:20778]	ENSORLG00000012987	43.47	21.44	-1.01972
		ENSORLG00000013007	7.81	3.51	-1.15385
LHX8 (2 of 2)	LIM homeobox 8 [Source:HGNC Symbol;Acc:28838]	ENSORLG00000013156	6.15	2.52	-1.28716
MYEOV2	Uncharacterized protein [Source:UniProtKB/TrEMBL;Acc:H2MD63]	ENSORLG00000013164	54.25	18.85	-1.52506
GADD45B (1 of 2)	growth arrest and DNA-damage-inducible, beta [Source:HGNC Symbol;Acc:4096]	ENSORLG00000013231	5.66	2.65	-1.09481
	Uncharacterized protein [Source:UniProtKB/TrEMBL;Acc:H2MDH9]	ENSORLG00000013272	3.42	1.42	-1.26811
	Uncharacterized protein [Source:UniProtKB/TrEMBL;Acc:H2ME17]	ENSORLG00000013414	11.82	5.26	-1.1681
	Uncharacterized protein [Source:UniProtKB/TrEMBL;Acc:H2MEW3]	ENSORLG00000013653	129.22	51.74	-1.32048
ATP5J2	Uncharacterized protein [Source:UniProtKB/TrEMBL;Acc:H2MF35]	ENSORLG00000013716	63.87	31.73	-1.00929
KIAA1107	Uncharacterized protein [Source:UniProtKB/TrEMBL;Acc:H2MFI7]	ENSORLG00000013848	80.1	39.98	-1.00252
OLA.28596	uncharacterized protein LOC100169838 precursor [Source:RefSeq peptide;Acc:NP_001121983]	ENSORLG00000013975	27.42	8.05	-1.76817
OLA.20522	Uncharacterized protein [Source:UniProtKB/TrEMBL;Acc:H2MG01]	ENSORLG00000013983	18.91	4.51	-2.06795
	Uncharacterized protein [Source:UniProtKB/TrEMBL;Acc:H2MG15]	ENSORLG00000013993	3.66	1.28	-1.5157
OLA.19494	uncharacterized protein LOC100049341 precursor [Source:RefSeq peptide;Acc:NP_001098225]	ENSORLG00000014006	8.82	2.43	-1.85982
	uncharacterized protein LOC100125455 precursor [Source:RefSeq peptide;Acc:NP_001098372]	ENSORLG00000014017	38.15	8.81	-2.11447
VWA5A (3 of 3)	von Willebrand factor A domain containing 5A [Source:HGNC Symbol;Acc:6658]	ENSORLG00000014072	6.45	2.01	-1.6821
C4ORF33	Uncharacterized protein [Source:UniProtKB/TrEMBL;Acc:H2MGU8]	ENSORLG00000014223	9.22	4.56	-1.01573
MRPL36	Ribosomal protein [Source:UniProtKB/TrEMBL;Acc:H2MH01]	ENSORLG00000014272	75.02	36.31	-1.04691
MECR	Uncharacterized protein [Source:UniProtKB/TrEMBL;Acc:H2MH90]	ENSORLG00000014347	23.84	10.55	-1.17614
JUNB (1 of 2)	jun B proto-oncogene [Source:HGNC Symbol;Acc:6205]	ENSORLG00000014533	3.01	1.21	-1.31476
OLA.17147	Uncharacterized protein [Source:UniProtKB/TrEMBL;Acc:H2MI13]	ENSORLG00000014585	23.34	11.6	-1.00868
ANPEP (1 of 3)	alanyl (membrane) aminopeptidase [Source:HGNC Symbol;Acc:500]	ENSORLG00000014593	5.2	2.21	-1.23447
	Uncharacterized protein [Source:UniProtKB/TrEMBL;Acc:H2MI98]	ENSORLG00000014657	2.46	1.11	-1.1481
	Uncharacterized protein [Source:UniProtKB/TrEMBL;Acc:H2MIQ3]	ENSORLG00000014785	29.38	5.26	-2.4817
	Uncharacterized protein [Source:UniProtKB/TrEMBL;Acc:H2MIY5]	ENSORLG00000014850	210.56	95.41	-1.14202
SLCO3A1 (1 of 2)	solute carrier organic anion transporter family, member 3A1 [Source:HGNC Symbol;Acc:10952]	ENSORLG00000014898	5.66	1.94	-1.54475
EMP1 (2 of 2)	epithelial membrane protein 1 [Source:HGNC Symbol;Acc:3333]	ENSORLG00000014920	13.08	5.44	-1.26568
RPS29	Uncharacterized protein [Source:UniProtKB/TrEMBL;Acc:H2MJF6]	ENSORLG00000015002	49.73	18.8	-1.40338
	Uncharacterized protein [Source:UniProtKB/TrEMBL;Acc:H2MJL6]	ENSORLG00000015052	18.02	8.6	-1.06719
SLX4	Uncharacterized protein [Source:UniProtKB/TrEMBL;Acc:H2MJR6]	ENSORLG00000015092	43.41	19.77	-1.13471
GNB1L	Uncharacterized protein [Source:UniProtKB/TrEMBL;Acc:H2MK85]	ENSORLG00000015242	9.27	3.98	-1.2198
	Uncharacterized protein [Source:UniProtKB/TrEMBL;Acc:H2MKE7]	ENSORLG00000015296	4.21	2.03	-1.05234
	Uncharacterized protein [Source:UniProtKB/TrEMBL;Acc:H2MKN1]	ENSORLG00000015376	3.76	1.72	-1.12832
ANAPC13	Uncharacterized protein [Source:UniProtKB/TrEMBL;Acc:H2MLC3]	ENSORLG00000015577	27.29	12.86	-1.08548
MT	Metallothionein [Source:UniProtKB/Swiss-Prot;Acc:Q6S4N8]	ENSORLG00000015580	28.05	11.05	-1.34395
	Uncharacterized protein [Source:UniProtKB/TrEMBL;Acc:H2MLH1]	ENSORLG00000015618	45.94	21.17	-1.11773
CCDC53	Uncharacterized protein [Source:UniProtKB/TrEMBL;Acc:H2MLM4]	ENSORLG00000015655	9.45	2.71	-1.80202
	LDL receptor-related protein; Uncharacterized protein [Source:UniProtKB/TrEMBL;Acc:Q9W7L8]	ENSORLG00000015660	11.18	3.18	-1.81382
CCDC124 (2 of 2)	coiled-coil domain containing 124 [Source:HGNC Symbol;Acc:25171]	ENSORLG00000015728	2.57	1.02	-1.3332
CCND2 (1 of 2)	cyclin D2 [Source:HGNC Symbol;Acc:1583]	ENSORLG00000015752	5.34	2.52	-1.08342
MAP6D1	Uncharacterized protein [Source:UniProtKB/TrEMBL;Acc:H2MM37]	ENSORLG00000015791	4.94	1.58	-1.64459
OLA.18	ZPC domain containing protein 4 precursor [Source:RefSeq peptide;Acc:NP_001098220]	ENSORLG00000016064	5.35	1.89	-1.50115
	Uncharacterized protein [Source:UniProtKB/TrEMBL;Acc:H2MNB0]	ENSORLG00000016150	258.94	122.42	-1.08078
BOLA1	Uncharacterized protein [Source:UniProtKB/TrEMBL;Acc:H2MNU3]	ENSORLG00000016299	145.2	68.17	-1.09083
FAM167A	Uncharacterized protein [Source:UniProtKB/TrEMBL;Acc:H2MPA8]	ENSORLG00000016424	31.57	13.5	-1.22559
OLA.21581	Uncharacterized protein [Source:UniProtKB/TrEMBL;Acc:H2MPC1]	ENSORLG00000016439	126.25	62.48	-1.01482
EFHB	Uncharacterized protein [Source:UniProtKB/TrEMBL;Acc:H2MPF3]	ENSORLG00000016463	321.19	149.24	-1.10579
OLA.5221	ZPB domain containing protein precursor [Source:RefSeq peptide;Acc:NP_001098217]	ENSORLG00000016580	12.27	3.17	-1.95258
AK8	Uncharacterized protein [Source:UniProtKB/TrEMBL;Acc:H2MPY9]	ENSORLG00000016621	60.15	21.34	-1.495
TRAF2 (2 of 2)	TNF receptor-associated factor 2 [Source:HGNC Symbol;Acc:12032]	ENSORLG00000016674	2.79	1.19	-1.2293
NDUFA12	Uncharacterized protein [Source:UniProtKB/TrEMBL;Acc:H2MQ53]	ENSORLG00000016680	77.41	33.56	-1.20578
IMP4	Uncharacterized protein [Source:UniProtKB/TrEMBL;Acc:H2MQ86]	ENSORLG00000016710	23.49	9.42	-1.31825
HERPUD2 (1 of 2)	HERPUD family member 2 [Source:HGNC Symbol;Acc:21915]	ENSORLG00000016752	152.12	69.66	-1.12681
	Uncharacterized protein [Source:UniProtKB/TrEMBL;Acc:H2MQG2]	ENSORLG00000016774	168.18	79.1	-1.08826
MRPL41	Uncharacterized protein [Source:UniProtKB/TrEMBL;Acc:H2MQJ7]	ENSORLG00000016798	91.13	30.27	-1.59004
PPP1R35	Uncharacterized protein [Source:UniProtKB/TrEMBL;Acc:H2MRU2]	ENSORLG00000017165	88.6	43.66	-1.02099
TMEM19	Uncharacterized protein [Source:UniProtKB/TrEMBL;Acc:H2MS05]	ENSORLG00000017212	47.19	21.8	-1.11415
OLA.1036	Uncharacterized protein [Source:UniProtKB/TrEMBL;Acc:H2MSF2]	ENSORLG00000017342	31.22	12.01	-1.37823
ARRDC1	Uncharacterized protein [Source:UniProtKB/TrEMBL;Acc:H2MSN0]	ENSORLG00000017410	5.4	2.22	-1.2824
CCDC66	Uncharacterized protein [Source:UniProtKB/TrEMBL;Acc:H2MSQ0]	ENSORLG00000017427	27.68	13.33	-1.05417
OLA.16591	Uncharacterized protein [Source:UniProtKB/TrEMBL;Acc:H2MSW5]	ENSORLG00000017482	13.44	1.78	-2.91658
C-FOS	c-fos protein [Source:RefSeq peptide;Acc:NP_001239163]	ENSORLG00000017502	14.66	4.96	-1.56347
C6ORF162	Uncharacterized protein [Source:UniProtKB/TrEMBL;Acc:H2MU30]	ENSORLG00000017811	12.06	4.9	-1.29938
OLA.15968	Uncharacterized protein [Source:UniProtKB/TrEMBL;Acc:H2MU41]	ENSORLG00000017822	48.08	20.6	-1.22279
TSSC1	Uncharacterized protein [Source:UniProtKB/TrEMBL;Acc:H2MU86]	ENSORLG00000017857	10.78	4.93	-1.1287
APOPT1	Uncharacterized protein [Source:UniProtKB/TrEMBL;Acc:H2MUE5]	ENSORLG00000017900	74.27	31.73	-1.22693
CHAC1	Uncharacterized protein [Source:UniProtKB/TrEMBL;Acc:H2MUV3]	ENSORLG00000018024	56.83	25.08	-1.18012
	Uncharacterized protein [Source:UniProtKB/TrEMBL;Acc:H2MVA1]	ENSORLG00000018152	6.88	1.46	-2.23644
NANOS1A	nanos1 [Source:RefSeq peptide;Acc:NP_001116380]	ENSORLG00000018180	16.62	8.18	-1.02275
NUPR1	Uncharacterized protein [Source:UniProtKB/TrEMBL;Acc:H2MVQ3]	ENSORLG00000018286	93.18	42.72	-1.12511
	Uncharacterized protein [Source:UniProtKB/TrEMBL;Acc:H2MVV9]	ENSORLG00000018340	11.5	5.39	-1.09328
	Uncharacterized protein [Source:UniProtKB/TrEMBL;Acc:H2MW19]	ENSORLG00000018401	4.91	1.62	-1.59973
	Uncharacterized protein [Source:UniProtKB/TrEMBL;Acc:H2MW71]	ENSORLG00000018455	16.92	7.43	-1.1873
OLA.6767	Uncharacterized protein [Source:UniProtKB/TrEMBL;Acc:H2MW89]	ENSORLG00000018472	135.78	65.13	-1.05988
	Uncharacterized protein [Source:UniProtKB/TrEMBL;Acc:H2MWC6]	ENSORLG00000018515	37.82	5.88	-2.68526
	Uncharacterized protein [Source:UniProtKB/TrEMBL;Acc:H2MWS0]	ENSORLG00000018667	32.89	15	-1.13269
	Uncharacterized protein [Source:UniProtKB/TrEMBL;Acc:H2MX64]	ENSORLG00000018824	35.2	15.87	-1.14927
	Uncharacterized protein [Source:UniProtKB/TrEMBL;Acc:H2MX96]	ENSORLG00000018864	6.46	2.84	-1.18564
	Uncharacterized protein [Source:UniProtKB/TrEMBL;Acc:H2MXG4]	ENSORLG00000018937	37.86	9.14	-2.05041
PHLDA2	Uncharacterized protein [Source:UniProtKB/TrEMBL;Acc:H2MXL2]	ENSORLG00000018983	19.69	5.74	-1.77834
OLA.26666	42Sp50 [Source:RefSeq peptide;Acc:NP_001098222]	ENSORLG00000019066	19.05	8.69	-1.13236
TMEM81	Uncharacterized protein [Source:UniProtKB/TrEMBL;Acc:H2MXZ7]	ENSORLG00000019125	119.38	57.61	-1.05117
	Uncharacterized protein [Source:UniProtKB/TrEMBL;Acc:H2MY45]	ENSORLG00000019183	7.14	2.51	-1.50824
OLA.7144	Uncharacterized protein [Source:UniProtKB/TrEMBL;Acc:H2MY97]	ENSORLG00000019238	21.46	7.89	-1.44355
CARS2 (1 of 2)	cysteinyl-tRNA synthetase 2, mitochondrial (putative) [Source:HGNC Symbol;Acc:25695]	ENSORLG00000019327	10.18	4.97	-1.03442
CCDC111 (1 of 2)	coiled-coil domain containing 111 [Source:HGNC Symbol;Acc:26575]	ENSORLG00000019572	34.49	15.04	-1.19737
UIMC1	Uncharacterized protein [Source:UniProtKB/TrEMBL;Acc:H2MZ75]	ENSORLG00000019577	33.17	14.56	-1.18787
YIPF2	Uncharacterized protein [Source:UniProtKB/TrEMBL;Acc:H2MZ96]	ENSORLG00000019602	90.65	44	-1.0428
UGT2A1	Uncharacterized protein [Source:UniProtKB/TrEMBL;Acc:H2MZ98]	ENSORLG00000019604	3.03	1.44	-1.07325
BVES	Uncharacterized protein [Source:UniProtKB/TrEMBL;Acc:H2MZF1]	ENSORLG00000019663	6.58	3.02	-1.12354
LMF1	Uncharacterized protein [Source:UniProtKB/TrEMBL;Acc:H2MZL9]	ENSORLG00000019736	12.21	5.78	-1.07892
	Uncharacterized protein [Source:UniProtKB/TrEMBL;Acc:H2MZN2]	ENSORLG00000019748	16.2	2.28	-2.82889
	Uncharacterized protein [Source:UniProtKB/TrEMBL;Acc:H2N011]	ENSORLG00000019884	3.73	1.85	-1.01165
OLA.19000	Uncharacterized protein [Source:UniProtKB/TrEMBL;Acc:H2N039]	ENSORLG00000019915	46.48	22.11	-1.07191
CYP51A1	Uncharacterized protein [Source:UniProtKB/TrEMBL;Acc:H2N0C8]	ENSORLG00000020002	4.18	2.04	-1.03493
ENDOU	Uncharacterized protein [Source:UniProtKB/TrEMBL;Acc:H2N0I2]	ENSORLG00000020058	8.55	3.65	-1.22803
OLA.6486	Uncharacterized protein [Source:UniProtKB/TrEMBL;Acc:H2N0R5]	ENSORLG00000020134	23.33	9.05	-1.3662
ZCCHC9	Uncharacterized protein [Source:UniProtKB/TrEMBL;Acc:H2N0R7]	ENSORLG00000020135	14.42	7.17	-1.00803
OLA.1660	Uncharacterized protein [Source:UniProtKB/TrEMBL;Acc:H2N0T7]	ENSORLG00000020154	95.31	39.46	-1.27224
	Uncharacterized protein [Source:UniProtKB/TrEMBL;Acc:H2N1A7]	ENSORLG00000020333	121.04	59.93	-1.01413
	Uncharacterized protein [Source:UniProtKB/TrEMBL;Acc:H2N1E6]	ENSORLG00000020370	52.58	22.65	-1.215
HSPB1	Uncharacterized protein [Source:UniProtKB/TrEMBL;Acc:H2N1K8]	ENSORLG00000020428	31.69	13.57	-1.22361
TGDS	Uncharacterized protein [Source:UniProtKB/TrEMBL;Acc:H2N1N2]	ENSORLG00000020450	12.44	6.11	-1.02574
	Uncharacterized protein [Source:UniProtKB/TrEMBL;Acc:H2N1U8]	ENSORLG00000020510	7.41	3.45	-1.10288
	Uncharacterized protein [Source:UniProtKB/TrEMBL;Acc:H2N1Y7]	ENSORLG00000020545	26.42	12.83	-1.04211
SQSTM1	Uncharacterized protein [Source:UniProtKB/TrEMBL;Acc:H2N214]	ENSORLG00000020572	54.12	20.81	-1.37888
TXNIP (2 of 2)	thioredoxin interacting protein [Source:HGNC Symbol;Acc:16952]	ENSORLG00000020580	3.81	1.42	-1.4239
	Uncharacterized protein [Source:UniProtKB/TrEMBL;Acc:H2N278]	ENSORLG00000020630	11.48	3.36	-1.77259
CCDC142	Uncharacterized protein [Source:UniProtKB/TrEMBL;Acc:H2N288]	ENSORLG00000020639	41.29	20.1	-1.0386
OLA.8892	Uncharacterized protein [Source:UniProtKB/TrEMBL;Acc:H2N2I2]	ENSORLG00000020728	7.38	2.85	-1.37266
OLA.20770	Uncharacterized protein [Source:UniProtKB/TrEMBL;Acc:H2N2P8]	ENSORLG00000020782	155.61	73.17	-1.08861
CSRP2BP	Uncharacterized protein [Source:UniProtKB/TrEMBL;Acc:H2N323]	ENSORLG00000020896	16.18	7.62	-1.08635
7SK	7SK RNA [Source:RFAM;Acc:RF00100]	ENSORLG00000021050	8.67	3.7	-1.22851
SNORD15	Small nucleolar RNA SNORD15 [Source:RFAM;Acc:RF00067]	ENSORLG00000021463	3.18	1.37	-1.21485
SNORD35	Small nucleolar RNA SNORD35 [Source:RFAM;Acc:RF00211]	ENSORLG00000021464	5.43	2.02	-1.4266
5S_rRNA	5S ribosomal RNA [Source:RFAM;Acc:RF00001]	ENSORLG00000021486	208.32	76.93	-1.43718
SNORA35	Small nucleolar RNA SNORA35 [Source:RFAM;Acc:RF00566]	ENSORLG00000021522	22.43	9.73	-1.20492
		ENSORLG00000021686	47.74	22.67	-1.07441
SCARNA13	Small Cajal body specific RNA 13 [Source:RFAM;Acc:RF00231]	ENSORLG00000021729	9.96	4.69	-1.08656
